# Supplementary material
Source: publisher figshare collection journal article supplement (https://acs.figshare.com/ndownloader/files/4848508)
Supplement: Supplementary file 1 [file 4848508]

**Supporting Information for**  
**Supramolecular Elastomers. Particulate  $\beta$ -Sheet Nanocrystal-Reinforced Synthetic Elastic Networks**

Joseph J. Scavuzzo,<sup>a</sup> Xuesong Yan,<sup>a</sup> Yihong Zhao,<sup>a</sup> Jacob D. Scherger,<sup>a</sup> Junyi Chen,<sup>a</sup> Shuo Zhang,<sup>a</sup> Hao Liu,<sup>a</sup> Min Gao,<sup>b</sup> Tao Li,<sup>c</sup> Xiuying Zhao,<sup>a,d</sup> Gary R. Hamed,<sup>a</sup> Mark D. Foster,<sup>a</sup> and Li Jia<sup>a\*</sup>

<sup>a</sup> Department of Polymer Science, The University of Akron, Akron, OH 44325-3909, USA.

<sup>b</sup> Liquid Crystal Institute and Chemical Physics Interdisciplinary Program, Kent State University, Kent, OH 44242, USA

<sup>c</sup> X-ray Science Division, Advanced Photon Source, Argonne National Laboratory Argonne, IL 60439, USA.

<sup>d</sup> Beijing University of Chemical Technology, Beijing, P. R. China.

**Contents**

1. Additional AFM images
2. Particle analysis based on adhesion maps from AFM
3. Energy dispersive X-ray analysis
4. Derivation of the relationship of  $N_{agg}$  and  $K$  according to open association model.

## 1. Additional AFM images

**AFM.** Both the height and phase images obtained in the tapping mode only revealed features attributed to the microtoming process as shown in Figure S1.

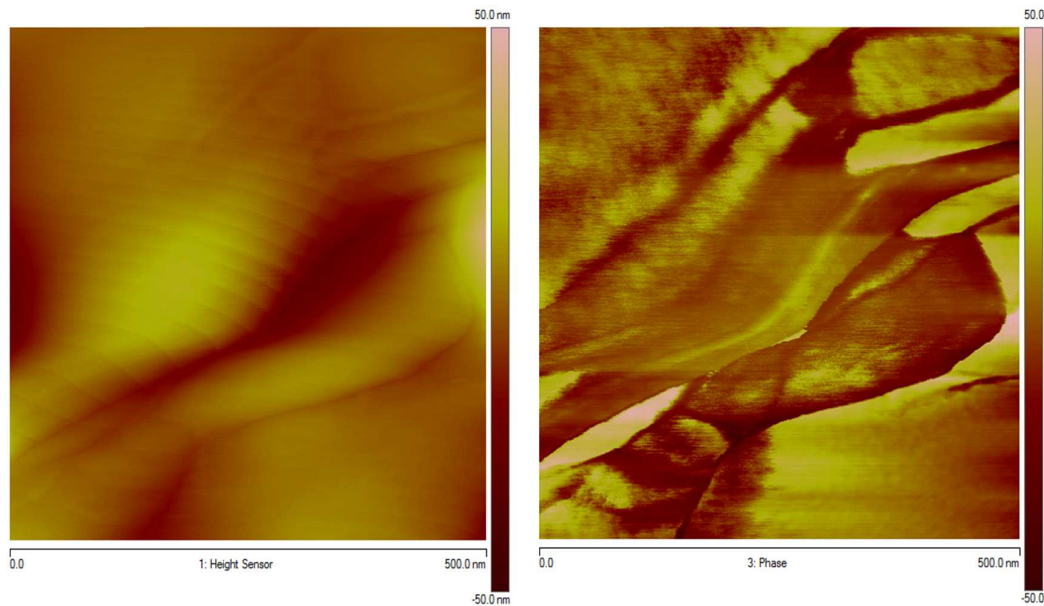

**Figure S1.** Height (left) and phase (right) images of microtomed films of **4c** obtained from tapping mode AFM. Only shear banding and contours from microtoming are observed.

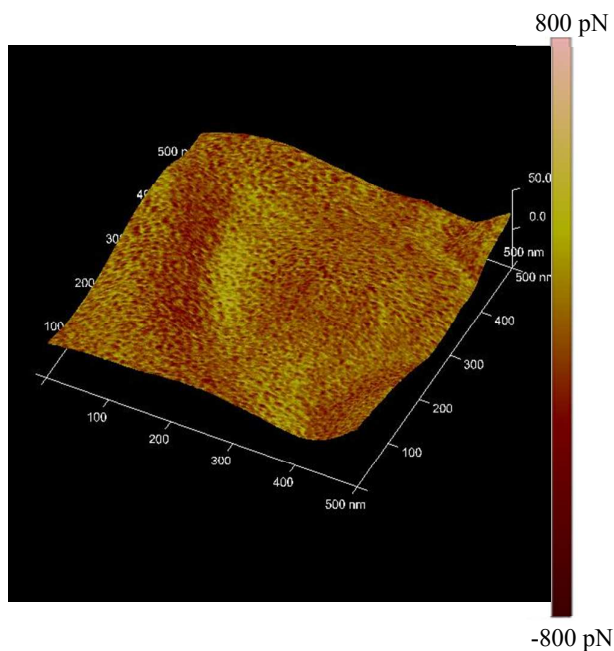

**Figure S2.** Height-adhesion overlay AFM images (500 nm x 500 nm) of **4c** in QNM mode.

2. Particle analysis based on adhesion maps from AFM

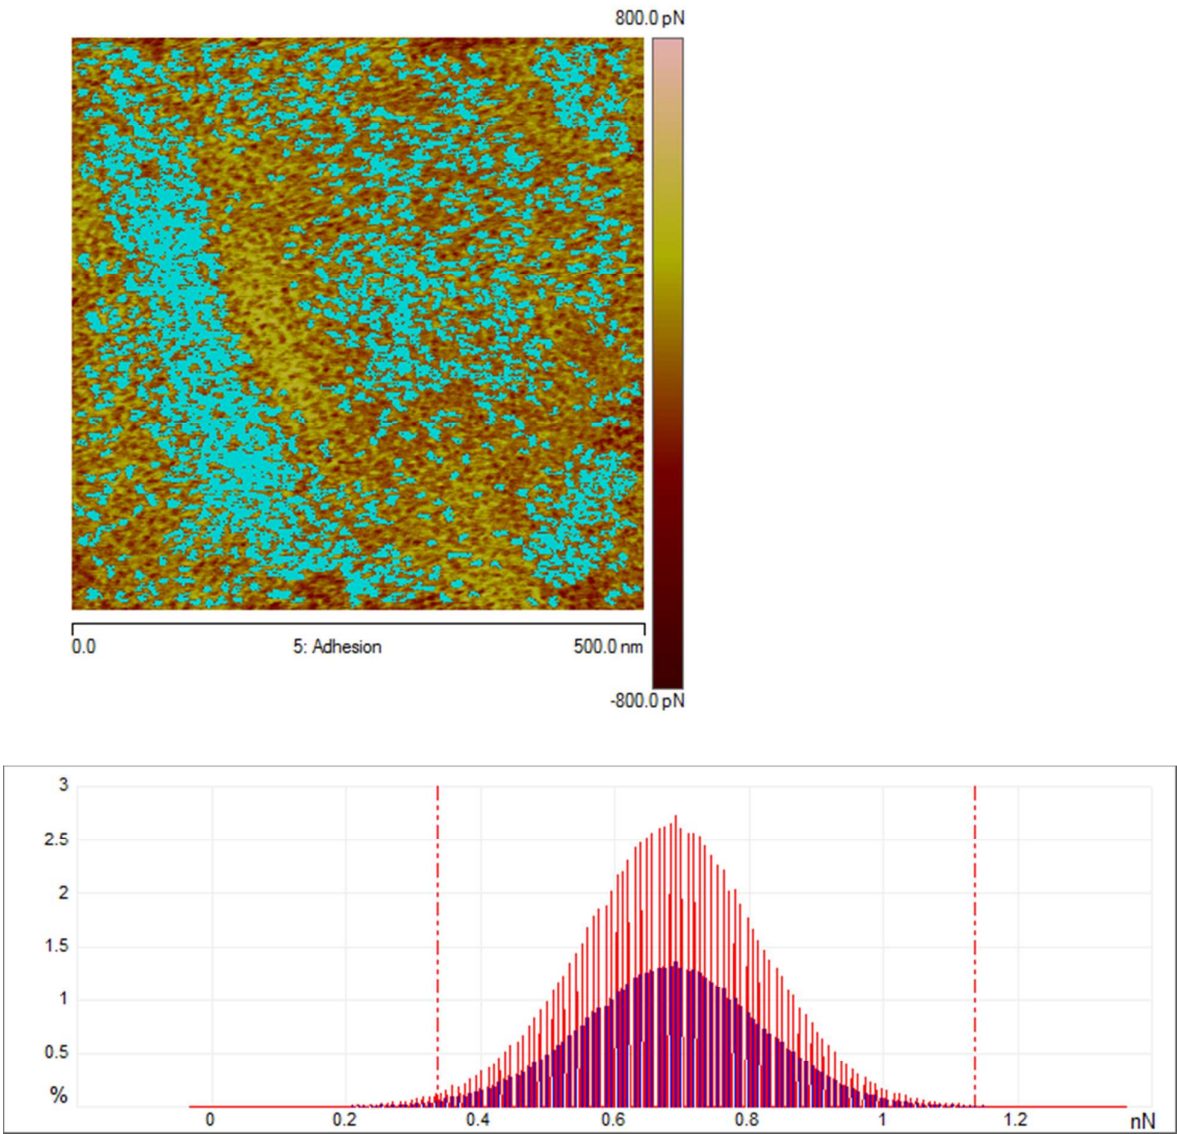

| Parameter   | Mean                     | Minimum                  | Maximum                  | Sigma                    |
|-------------|--------------------------|--------------------------|--------------------------|--------------------------|
| Total Count | 580                      | 580                      | 580                      | 0.00                     |
| Density     | 2000 (/μm <sup>2</sup> ) | 2000 (/μm <sup>2</sup> ) | 2000 (/μm <sup>2</sup> ) | 0.00                     |
| Height      | -0.3 (nN)                | -0.6 (nN)                | -0.1 (nN)                | 0.08 (nN)                |
| Area        | 102.9 (nm <sup>2</sup> ) | 23.8 (nm <sup>2</sup> )  | 14816 (nm <sup>2</sup> ) | 622.8 (nm <sup>2</sup> ) |
| Diameter    | 9.2 (nm)                 | 5.5 (nm)                 | 137.3 (nm)               | 6.8 (nm)                 |

**Figure S3.** Particle analysis using an adhesion map. Top, Adhesion map with particles identified by NanoScope Analysis v1.2 software. Middle, Histogram of particle adhesion distribution. Bottom, Summary of analysis.

### 3. Energy dispersive X-ray analysis

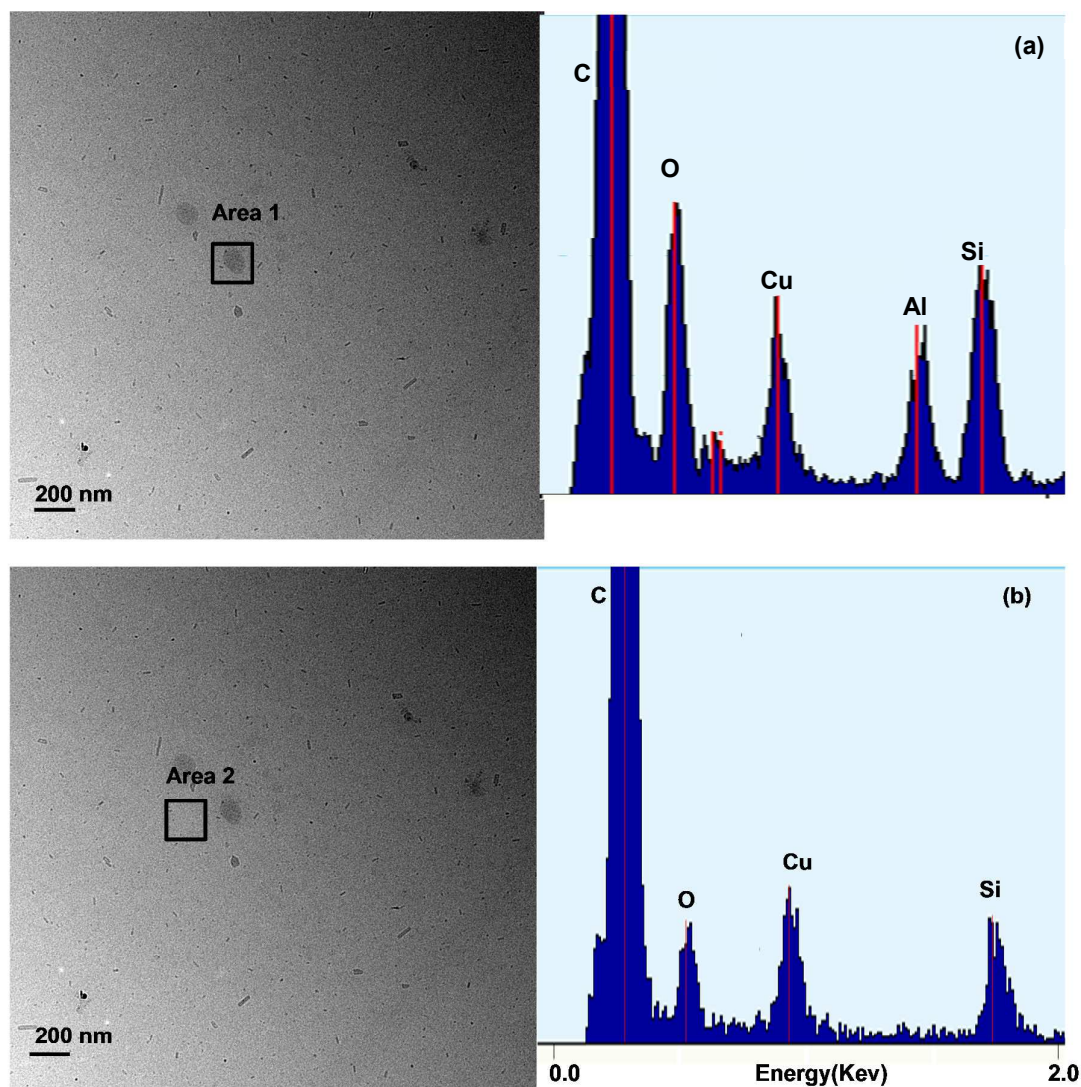

**Figure S4.** EDS of Areas 1 and 2 indicated by the squares. Area 1 is contaminated by Al which is most likely the residual of  $\text{EtAlCl}_2$  catalyst for the Alder ene reaction.

#### 4. Derivation of the relationship of $N_{agg}$ and $K$ according to open association model.

We rewrite the open association as the following:

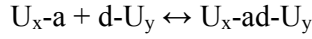

where  $d-U_x$  represents all aggregates of any degree of aggregation with a reactive end group “d”,  $U_y-a$  represents all aggregates of any degree of aggregation with a reactive end group “a”, and  $U_x-ad-U_y$  represents all aggregates of any degree of aggregation and contains reacted “ad” groups. Further, the equilibrium constant of the above process is  $K$ , the extent of reaction of either the reactive group “a” or “d” at equilibrium is  $p$ , and the number average degree of aggregation to be  $N_{agg}$  at eq, and  $N_{agg} = (1-p)^{-1}$ , and the initial concentration of the reactive groups “a” and “d” is the initial unimer concentration,  $[U]_o$ .

At equilibrium, the concentrations of the reactive groups “d” and “a” are both  $([U]_o - p[U]_o)$ , and the concentration of the reacted group “ad” is  $p[U]_o$ . Hence, the equilibrium constant can be expressed as:

$$K = p[U]_o / ([U]_o - p[U]_o)^2$$

Substitute  $N_{agg}$  for  $p$ ,

$$K = (N_{agg}^2 - N_{agg}) / [U]_o$$

Solve for  $N_{agg}$ ,

$$N_{agg} = \frac{1}{2} [1 + (1 + 4 K [U]_o)^{1/2}]$$

When  $N_{agg}$  is a relatively large number,  $N_{agg} \approx (K [U]_o)^{1/2}$
